# Supplementary material for: Distinct subpopulations of D1 medium spiny neurons exhibit unique transcriptional responsiveness to cocaine
Source: PubMed Central journal article supplement — bioRxiv. 2023 Jan 13:2023.01.12.523845. Preprint. [Version 1] doi: 10.1101/2023.01.12.523845 (PMC9882178; doi:10.1101/2023.01.12.523845), 2023-01-13
Supplement: NIHPP2023.01.12.523845v1-supplement-7.pdf [file NIHPP2023.01.12.523845v1-supplement-7.pdf]

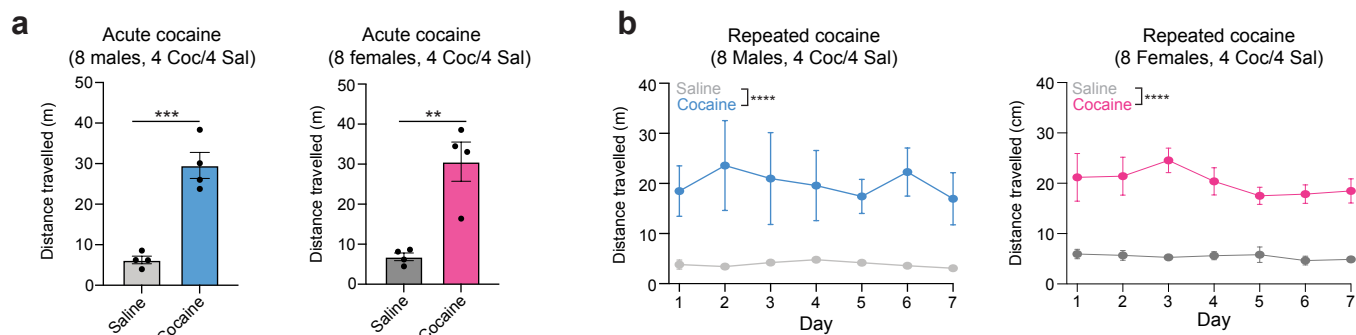

**Supplementary Figure 1.** Cocaine-induced locomotor changes. **a**, Male and female Sprague-Dawley rats were treated with 20mg/kg for 1 hour and locomotor behavior was measured for 30 minutes. Cocaine-treated animals travelled significantly more than saline-treated animals. Left, acute cocaine-induced locomotor changes in male rats ( $n=4/\text{group}$ , unpaired Student's  $t$ -test:  $t(6)=6.974$ ,  $***p<0.0005$ ). Right, acute cocaine-induced locomotor changes in female rats ( $n=4/\text{group}$ , unpaired Student's  $t$ -test:  $t(6)=4.769$ ,  $**p<0.005$ ) Data from Savell\*, Tuscher\*, Zipperly\*, Duke\*, Phillips\* et al. 2020, *Science Advances*. **b**, Male and female Sprague-Dawley rats were treated with 20mg/kg once daily for 7 consecutive days. Locomotor behavior was measured for 30 minutes. Cocaine-treated animals travelled significantly more than saline-treated animals on each testing day. Left, repeated cocaine-induced locomotor changes in male rats across 7 days ( $n=4/\text{group}$ , two-way ANOVA for main effect of treatment  $F_{(1,42)} = 41.40$ ,  $****p<0.0001$ ). Right, repeated cocaine-induced locomotor changes in female rats across 7 days ( $n=4/\text{groups}$ , two-way ANOVA for main effect of treatment,  $F_{(1,42)} = 156.8$ ,  $****p<0.0001$ ).

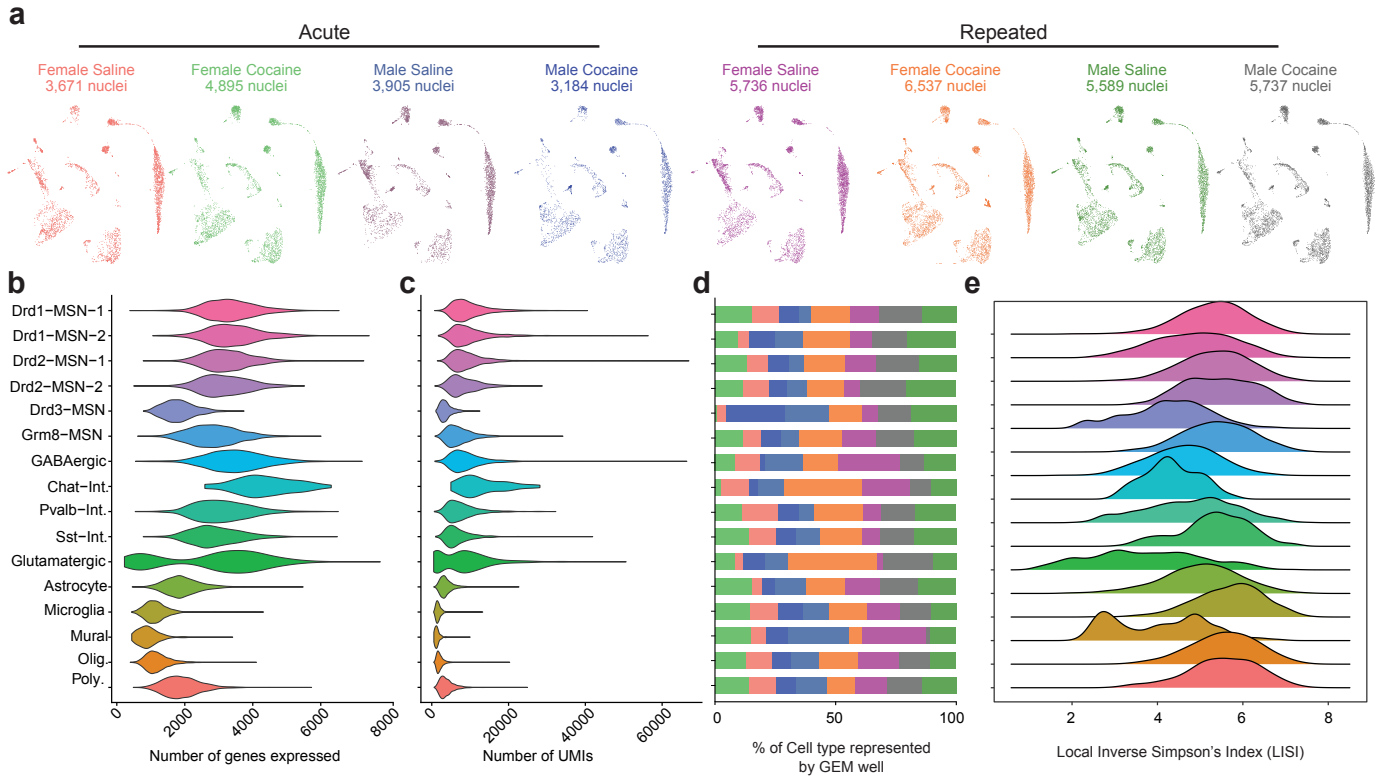

**Supplementary Figure 2.** Clustering and integration quality control. **a**, UMAPs grouped by sex and treatment group for the acute and repeated dataset. **b**, Violin plot showing the number of genes expressed in each cell type. **c**, Violin plot showing the number of unique molecular identifiers (UMIs) within each cell type. **d**, Bargraph showing the percentage of each cell type represented by each of the 8 individual GEM wells used for integration. **e**, Ridge plot for Local Inverse Simpson's Index (LISI) for each cell type. LISI is a measure of integration success with higher values indicating a well-mixed cluster.

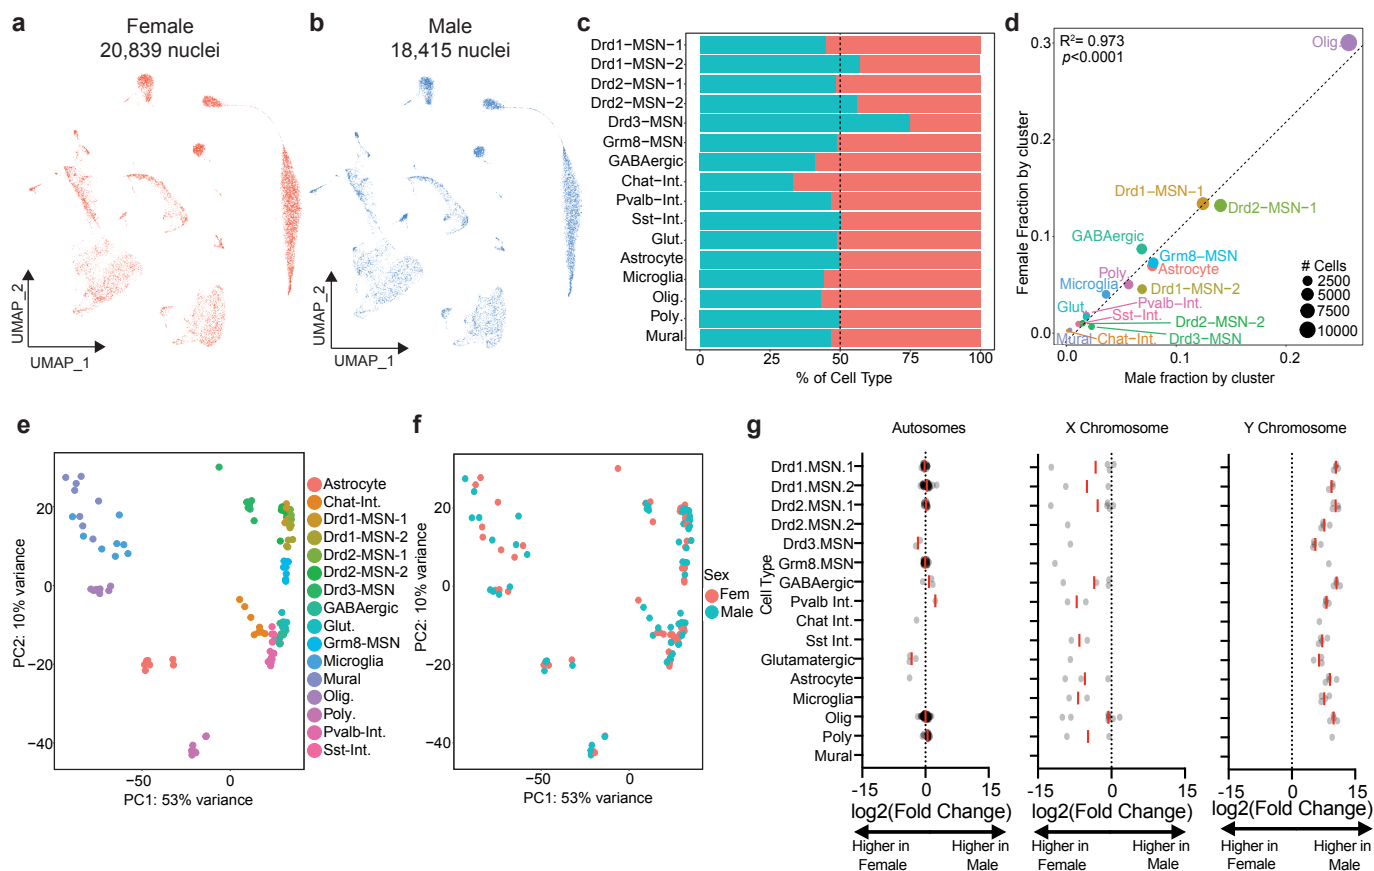

**Supplementary Figure 3.** Comparison of baseline transcriptional profiles of male and female cells. **d**, Correlation of the fraction of male and female cells represented by each cluster. **a-b**, UMAPs split by sex. **c**, Percentage of each cell type represented by each sex. **d**, Correlation of the fraction of male and female cells represented by each cluster. Size of the point is representative of the number of cells within the cluster. **e-f**, PCA plots demonstrating that variance within the dataset is largely driven by transcriptional profiles of the cell types and not sex. Each cell type will have 8 individual points that represent 8 GEM wells. **g**, DEGs calculated using a DESeq2-based pseudobulk analysis with dataset and stim used as covariates. Each point on the graph represents a single DEG. The red line represents the average  $\log_2(\text{Fold Change})$  of all DEGs for that cluster.

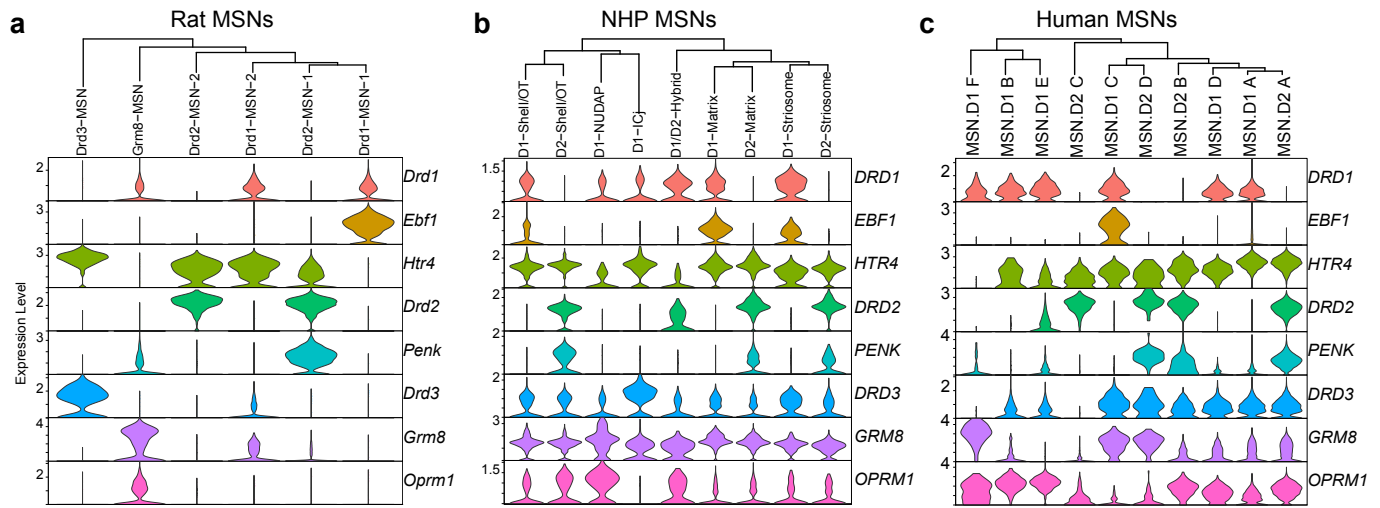

**Supplementary Figure 4.** Expression of MSN marker genes across species. **a-c**, Violin plots demonstrating expression of MSN specific markers in rat, NHP, and human MSN clusters.

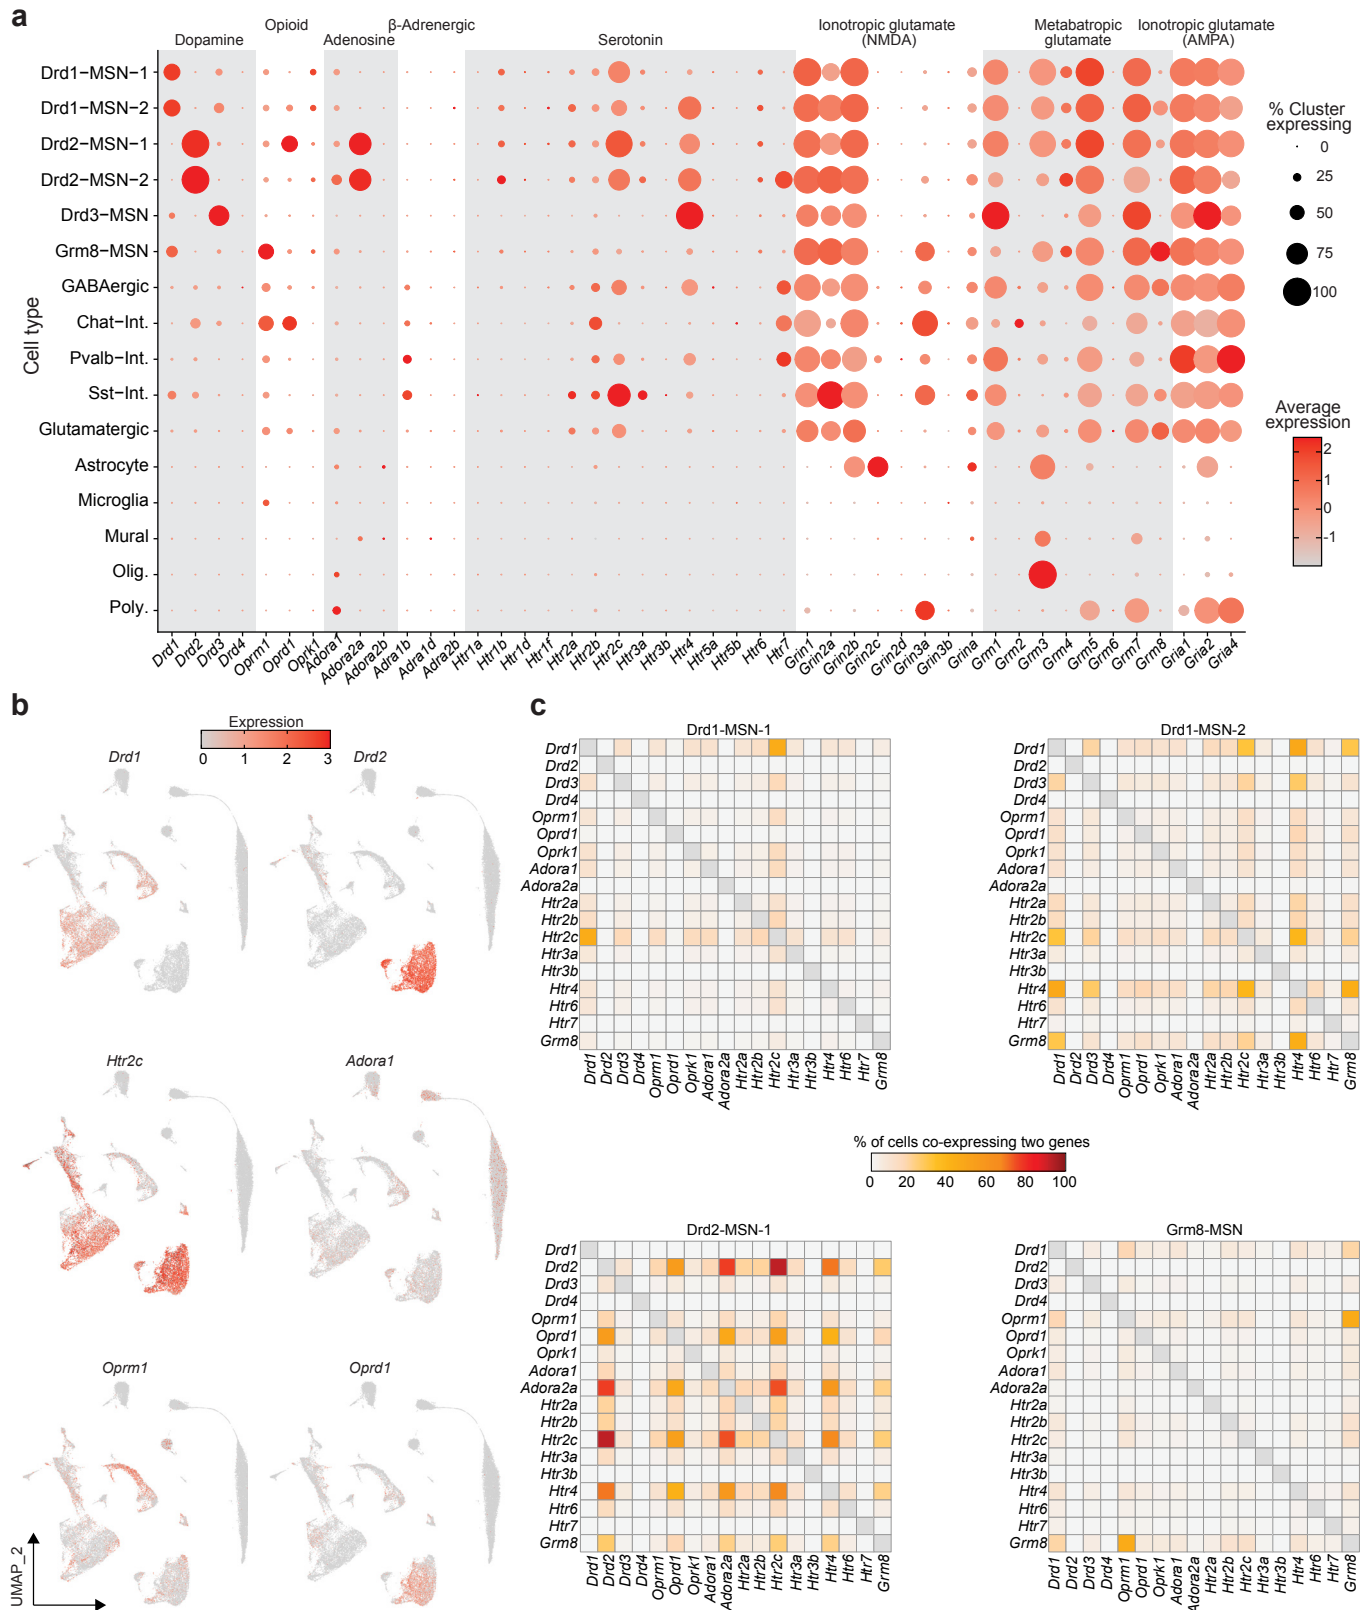

**Supplementary Figure 5.** Distribution of expression of genes encoding several receptor systems and subtypes. **a**, Dotplot demonstrating level of expression, and percentage of cells, expressing 46 genes involved in 8 receptor systems. **b**, UMAPs colored by level of expression of *Drd1*, *Drd2*, *Htr2c*, *Adora1*, *Oprm1*, and *Oprd1*. **c**, Co-expression heatmaps for several receptor systems demonstrating differential expression of serotonergic receptors in *Drd1*-expressing MSNs, co-expression of *Drd2* and *Adora2a* in the *Drd2*-MSN population, and *Grm8* and *Oprm1* in the *Grm8*-MSN population.

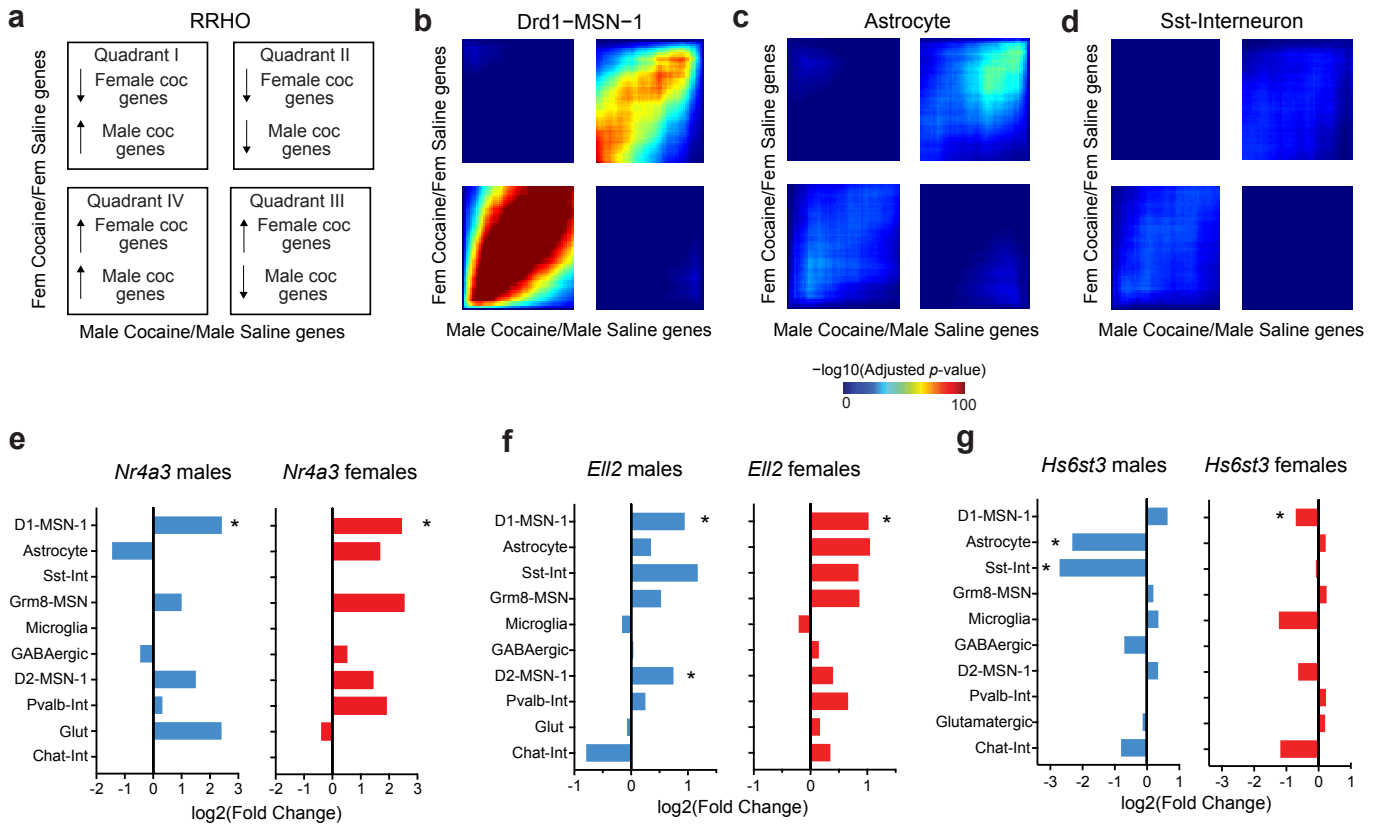

**Supplementary Figure 6.** Sex- and cell type-specific comparison of cocaine-induced transcriptional changes identified using pseudobulk differential expression analysis. **a**, Interpretation key for rank-rank hypergeometric overlap (RRHO) heatmaps for sex- and population- specific cocaine genes. Quadrants I and III contain discordant gene changes; quadrants II and IV highlight concordant gene changes. **b-d**, RRHO plots for D1-MSN-1, Astrocyte and Sst-Interneuron populations. Bar graphs illustrating representative example genes with similar transcriptional responses to cocaine across populations (**e-f**) and dynamic regulation across populations (**g**).
